# Supplementary material
Source: ML conference proceedings conference paper supplement (https://openreview.net/forum?id=AVKQ84IepW4)

Lifelong Regret  $R(m, n)$

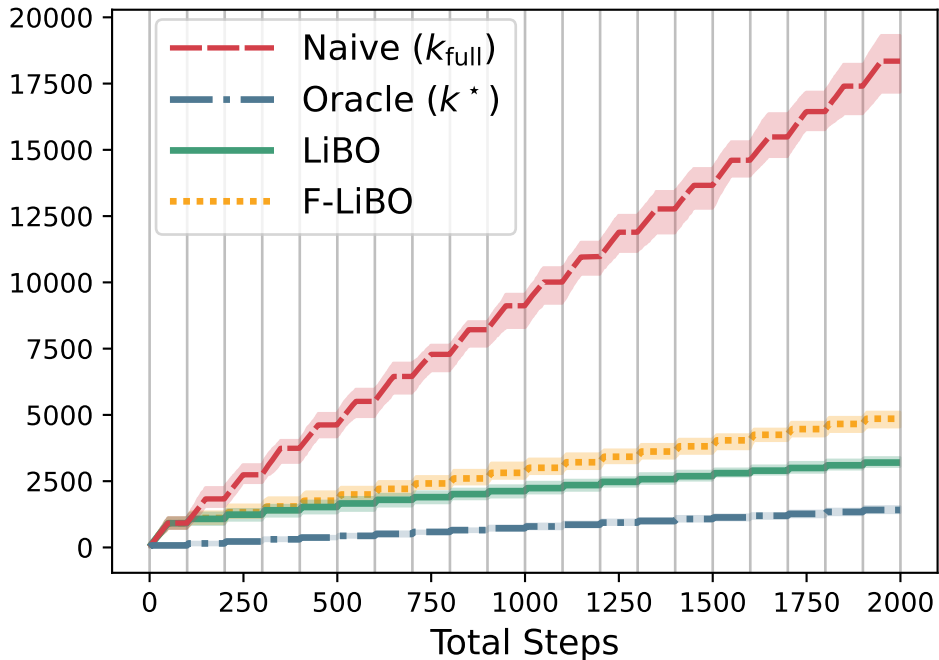

Supplement: supplementary_material [file attachment]

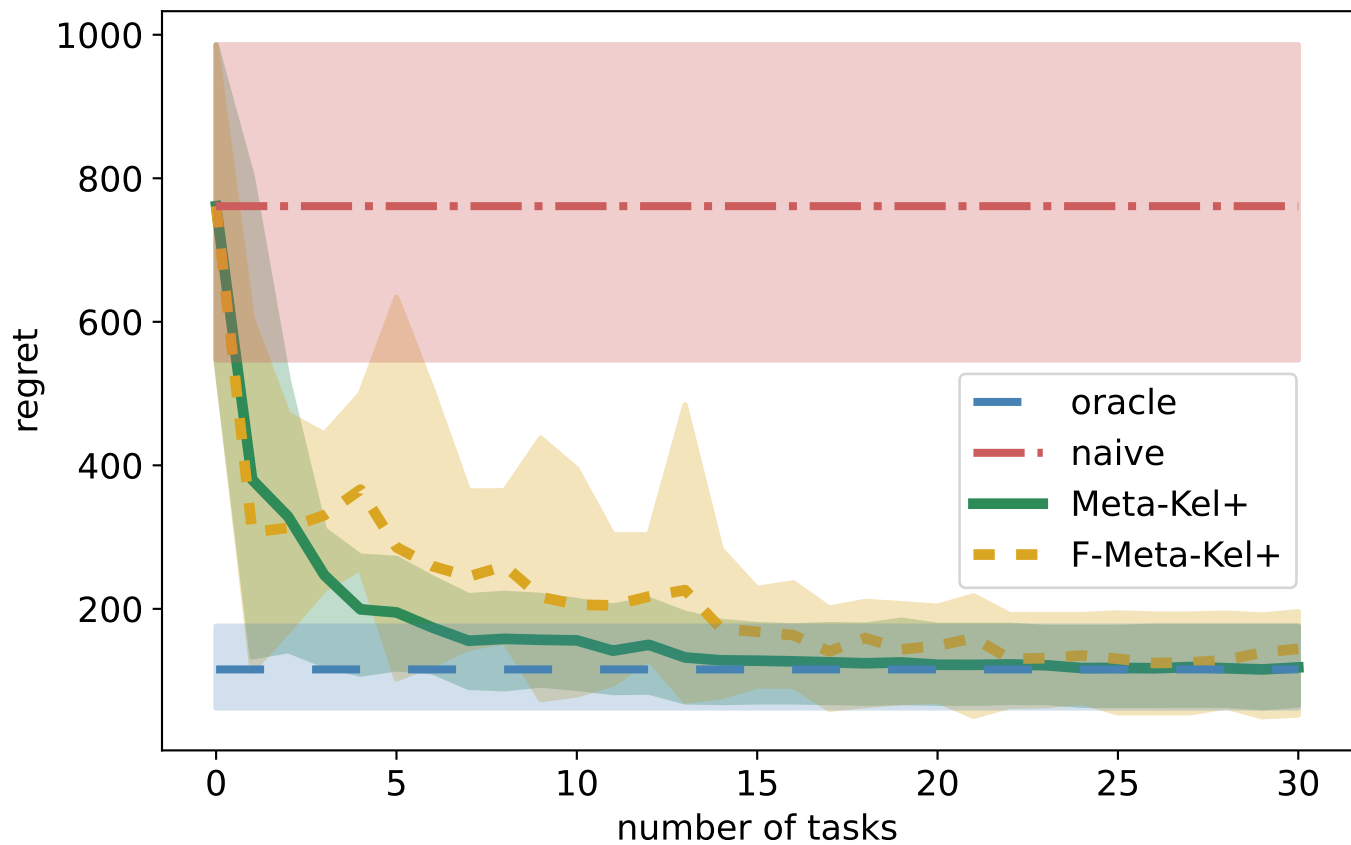

Supplement: supplementary_material [file attachment]

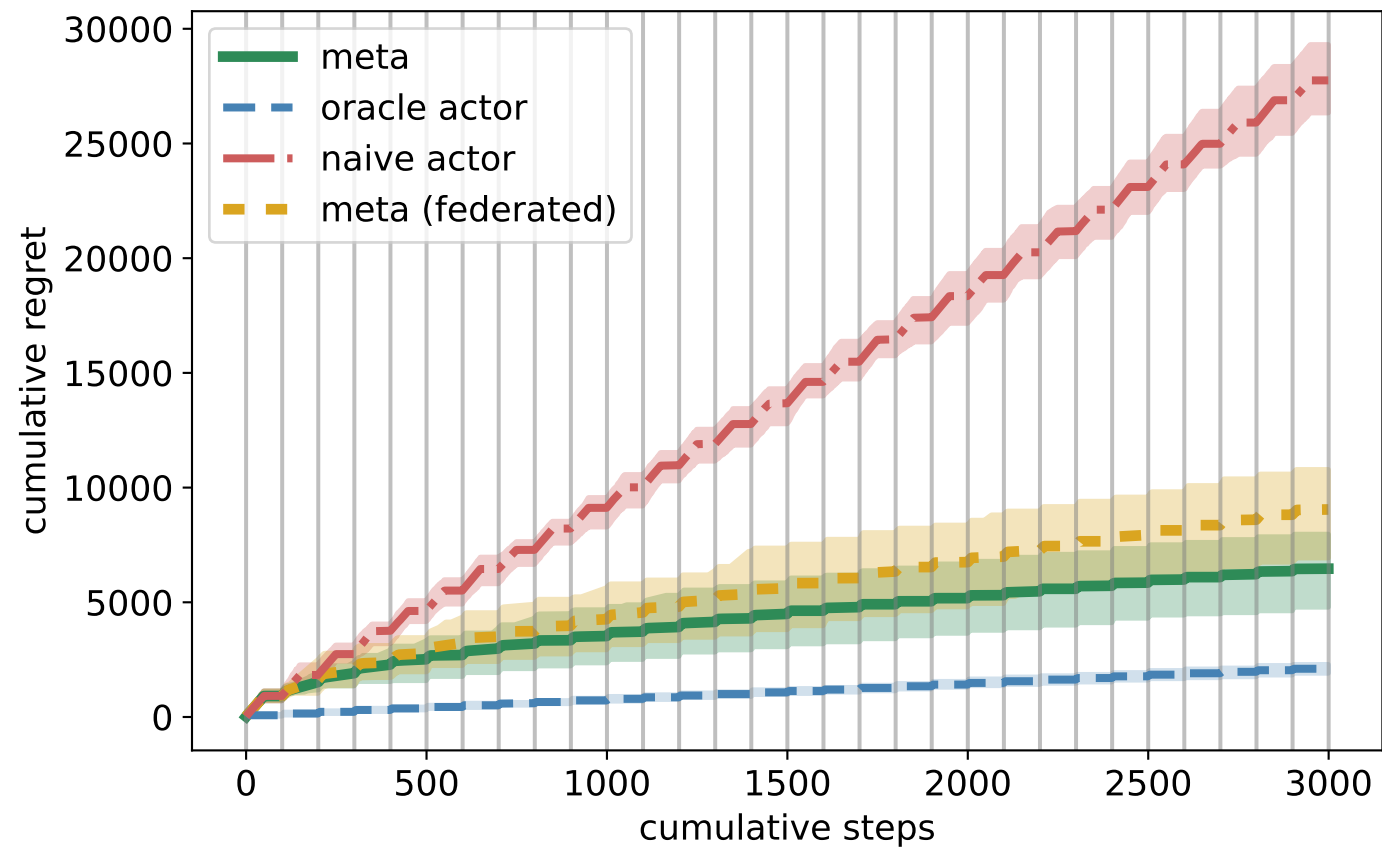

Supplement: supplementary_material [file attachment]

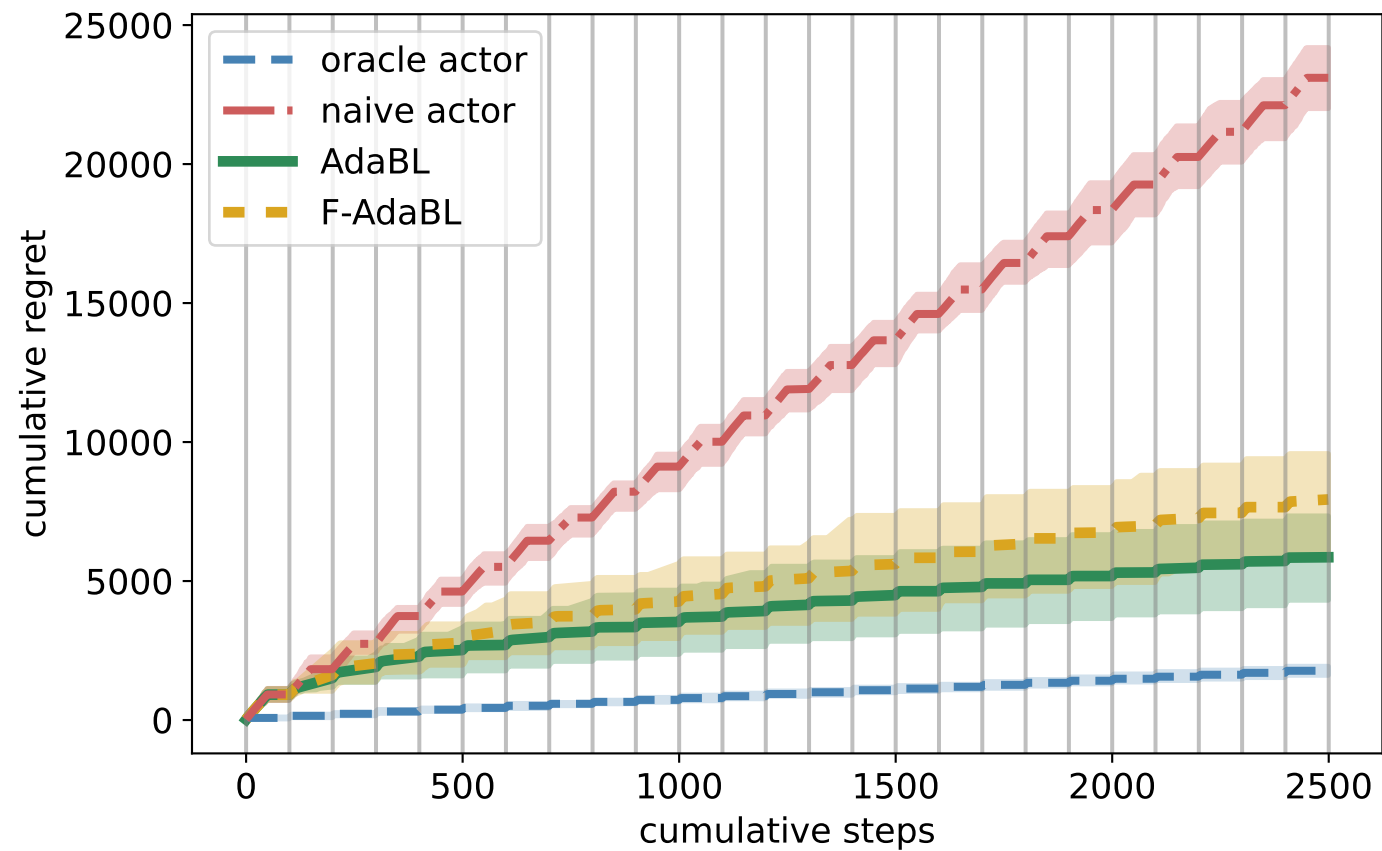

Supplement: supplementary_material [file attachment]

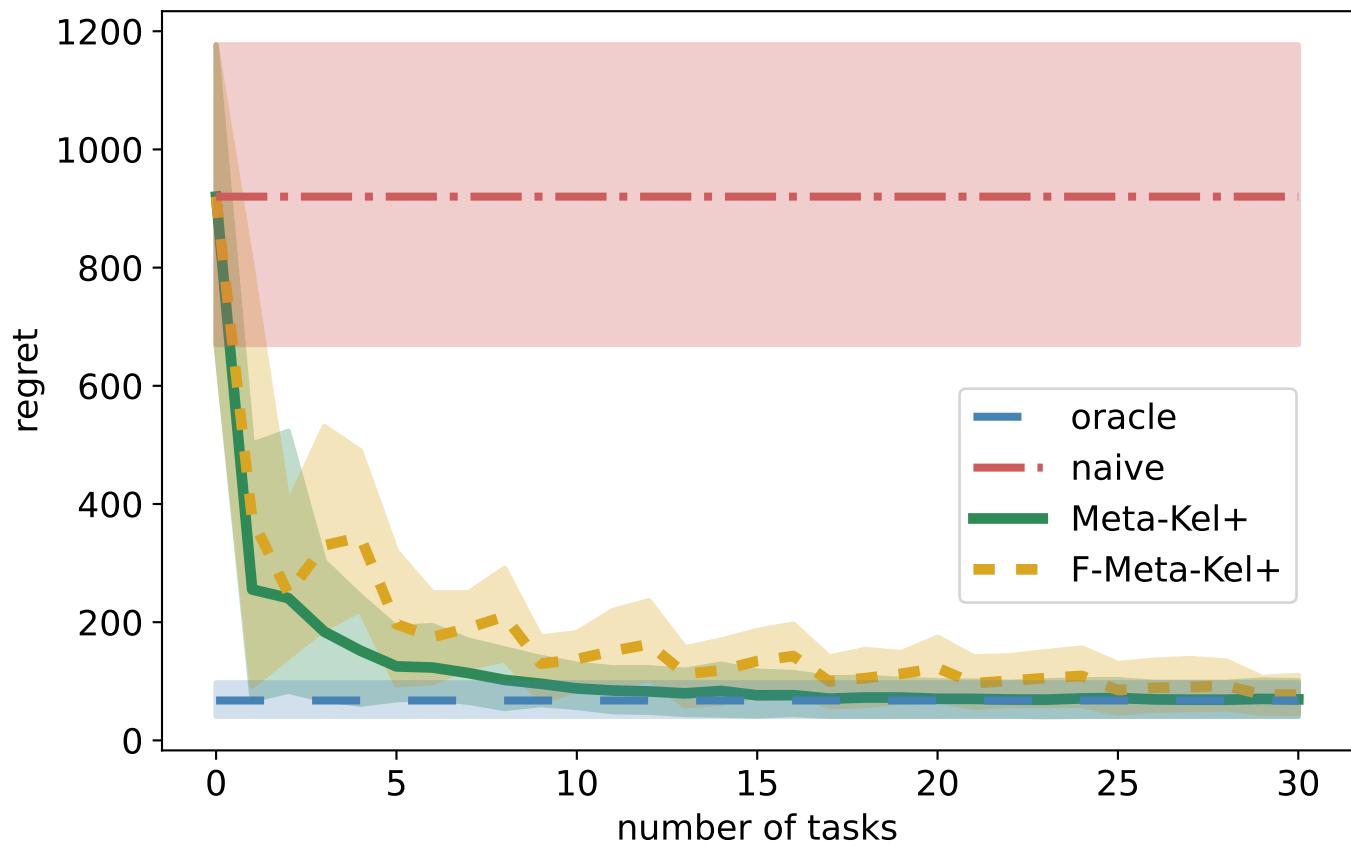

Supplement: supplementary_material [file attachment]

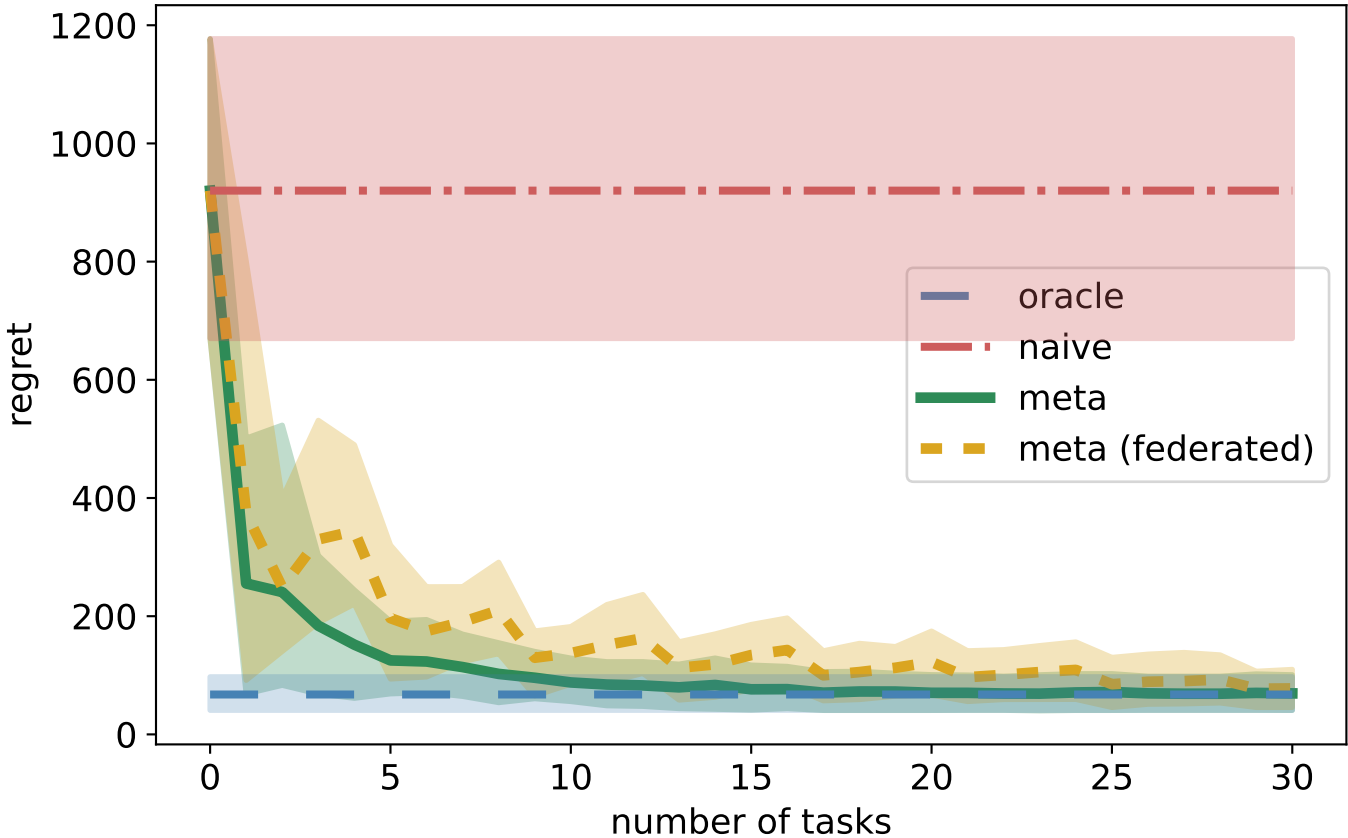

Supplement: supplementary_material [file attachment]

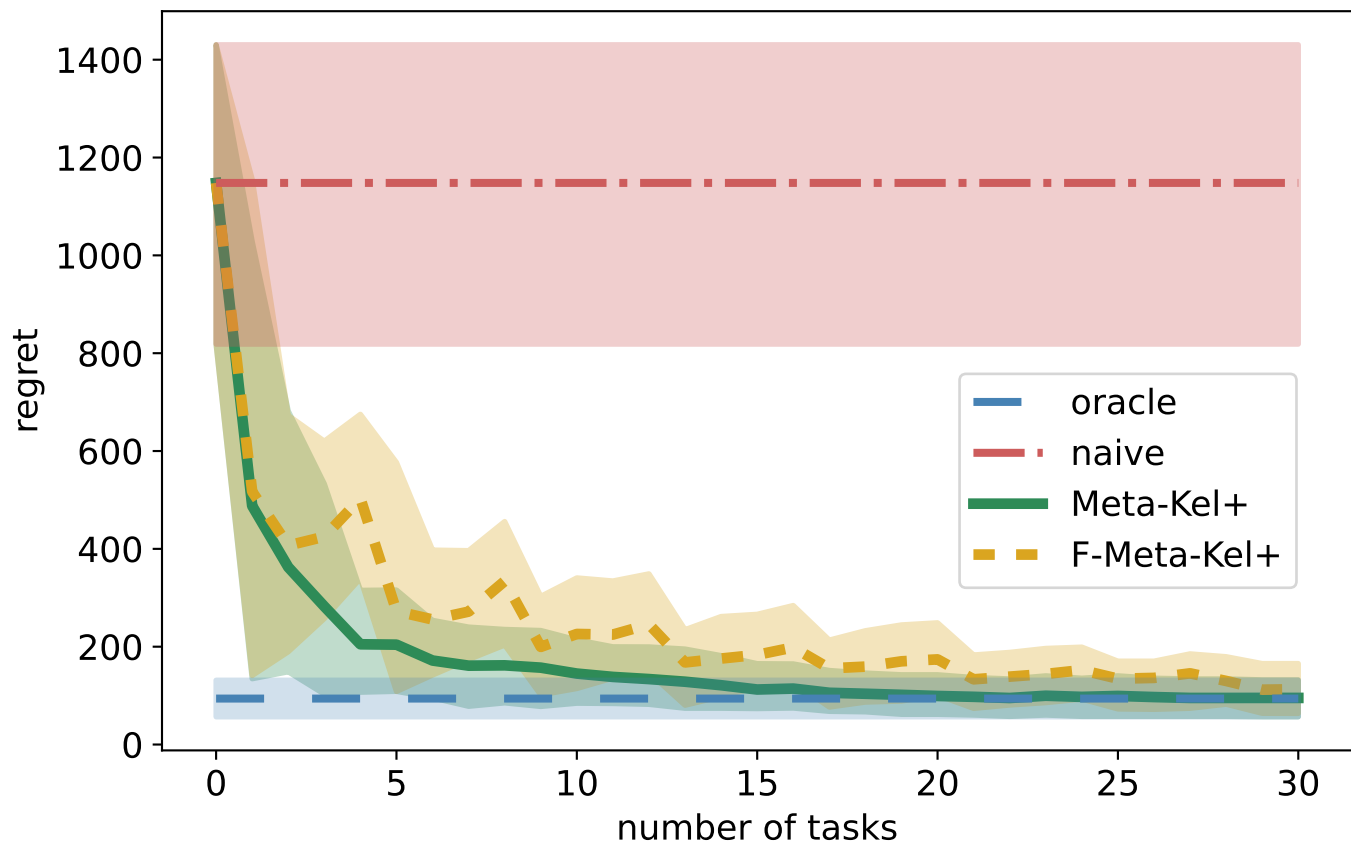

Supplement: supplementary_material [file attachment]

Lifelong Regret  $R(m, n)$

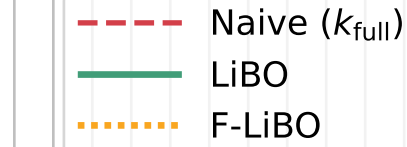

Total Steps

Supplement: supplementary_material [file attachment]

Single-task Regret  $R(n)$ 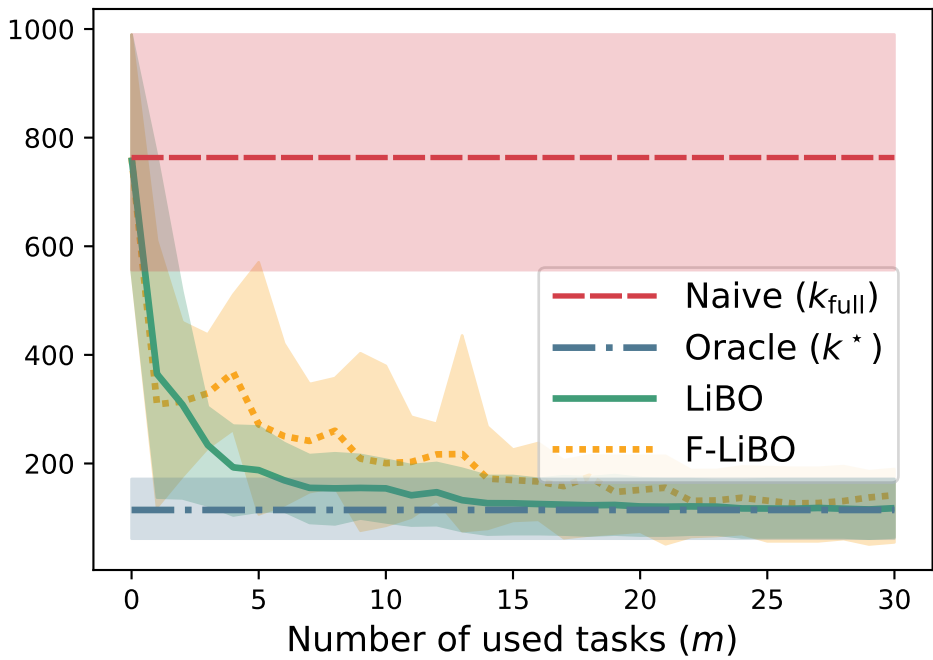

Supplement: supplementary_material [file attachment]

Single-task Regret  $R(n)$

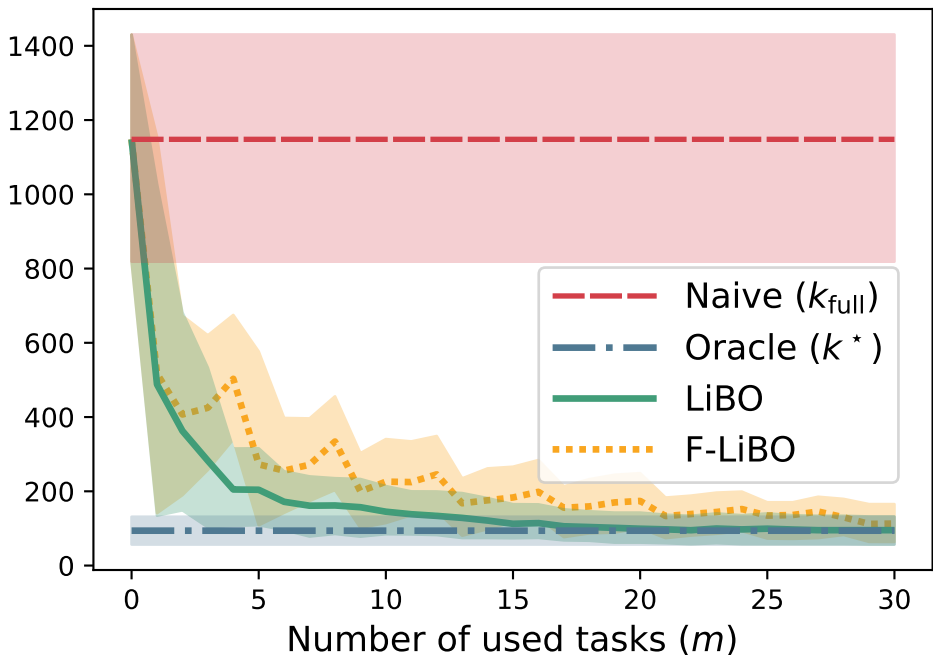

Supplement: supplementary_material [file attachment]

Lifelong Regret  $R(m, n)$

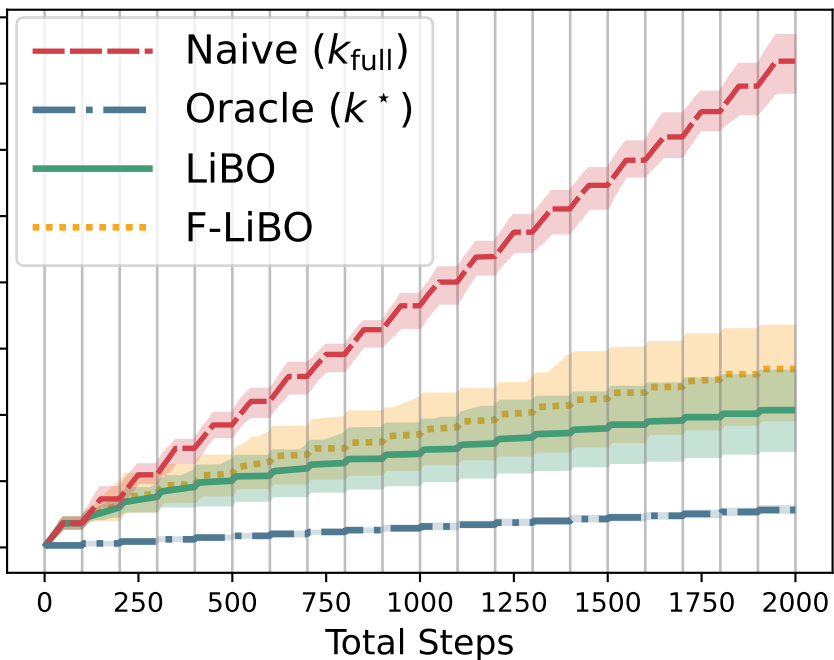

Supplement: supplementary_material [file attachment]

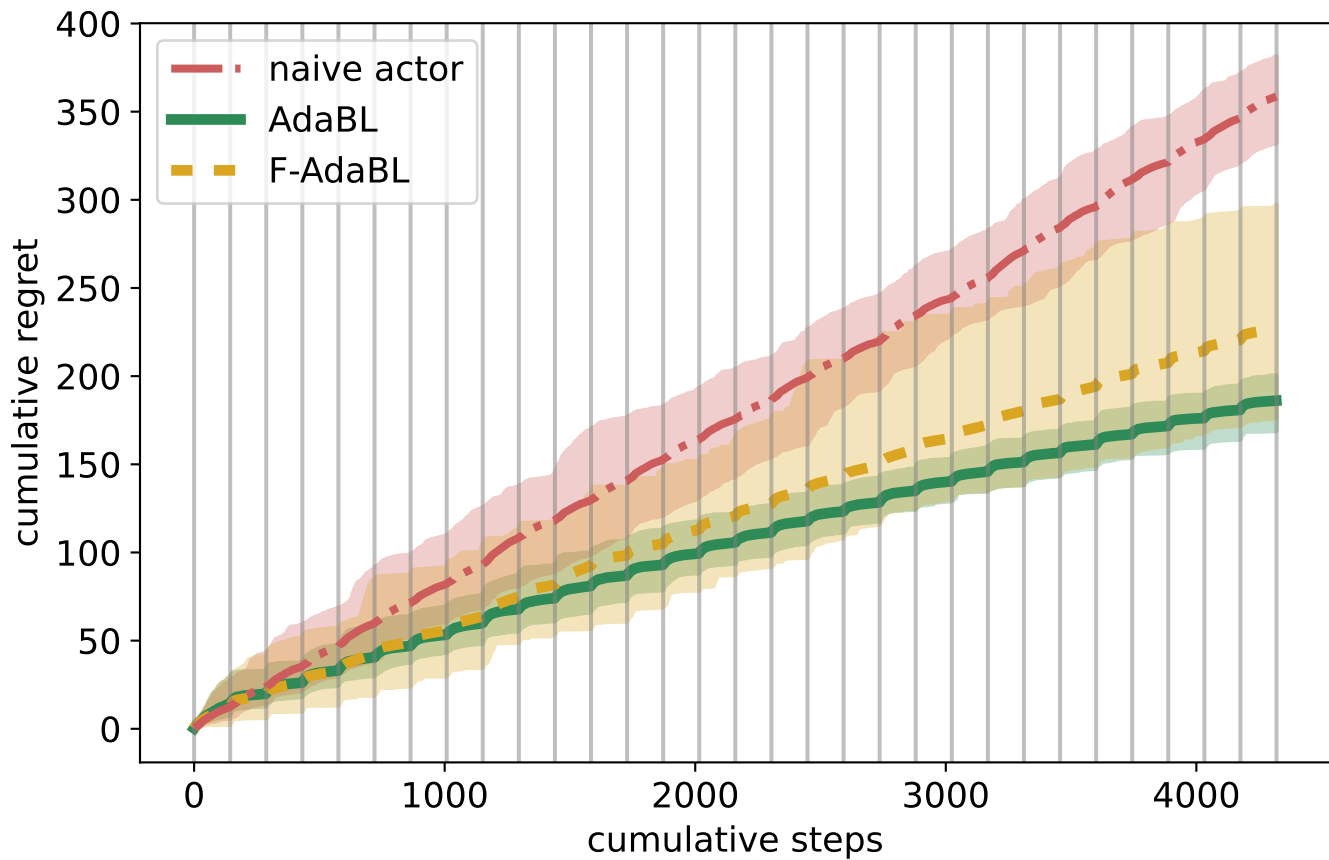

Supplement: supplementary_material [file attachment]

Lifelong Regret  $R(m, n)$ 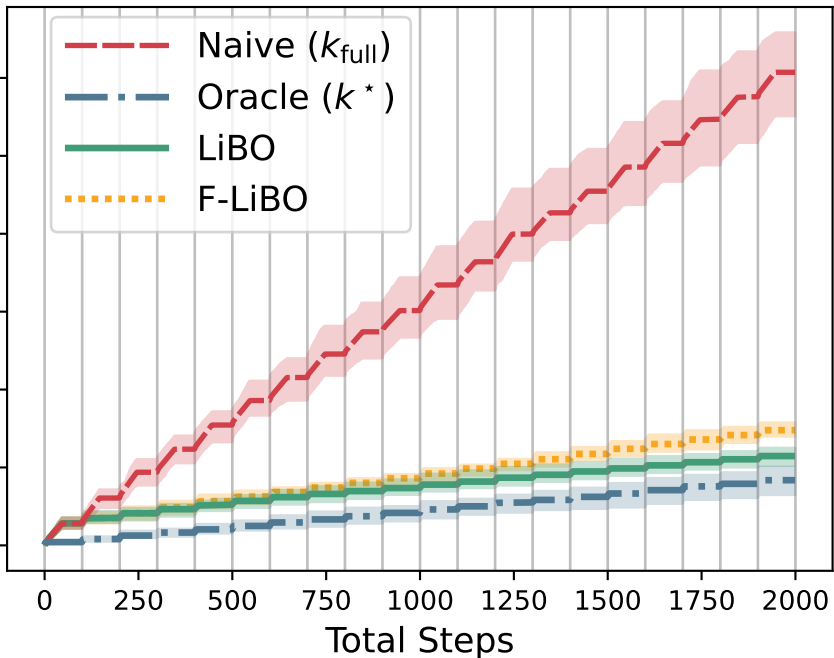

Supplement: supplementary_material [file attachment]

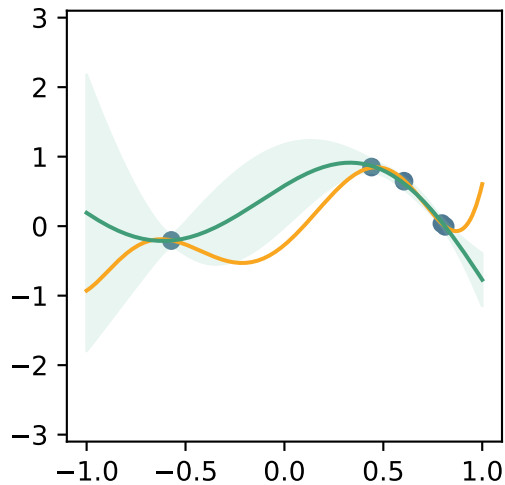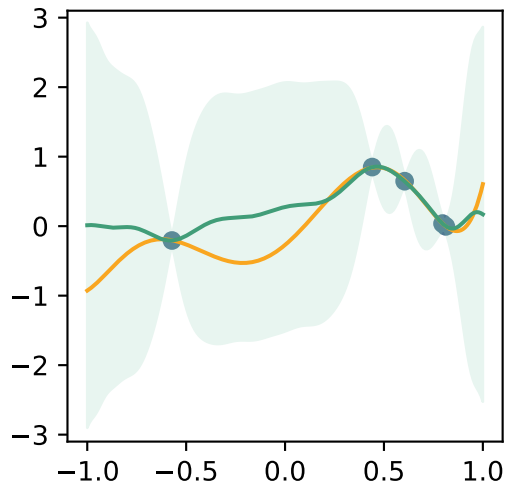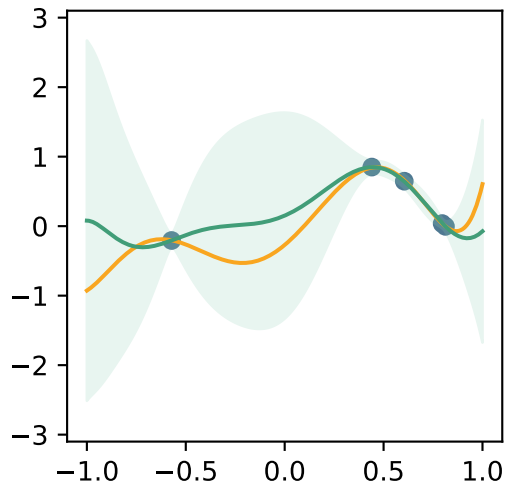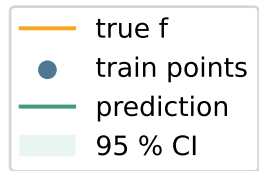

Supplement: supplementary_material [file attachment]

Single-task Regret  $R(n)$ 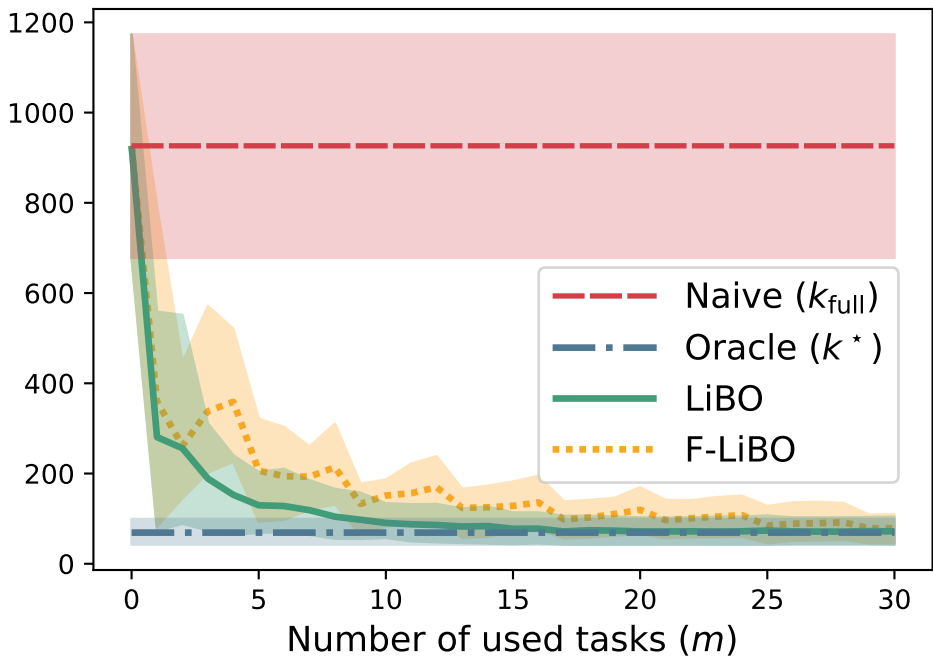

Supplement: supplementary_material [file attachment]

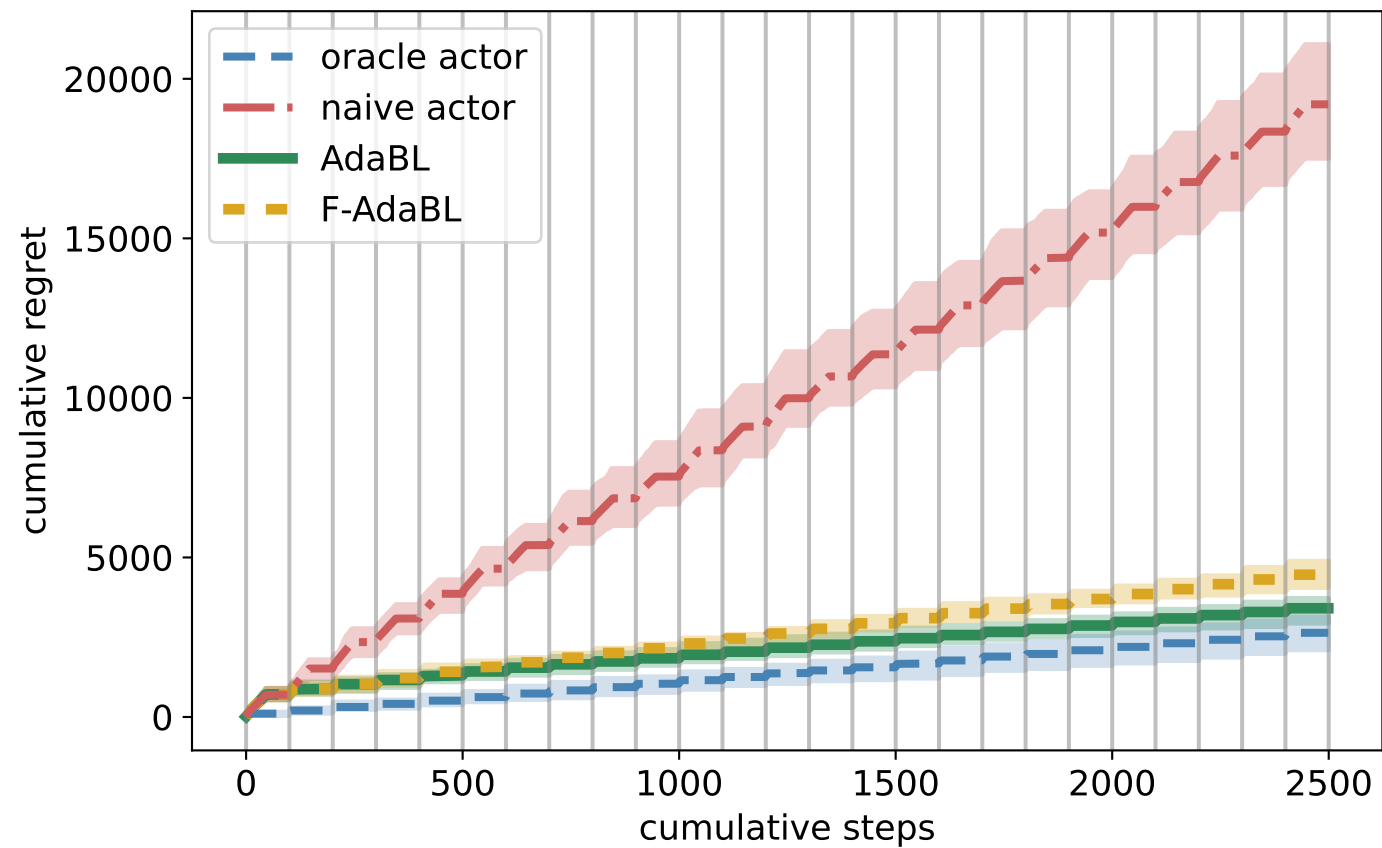

Supplement: supplementary_material [file attachment]

Lifelong Regret  $R(m, n)$ 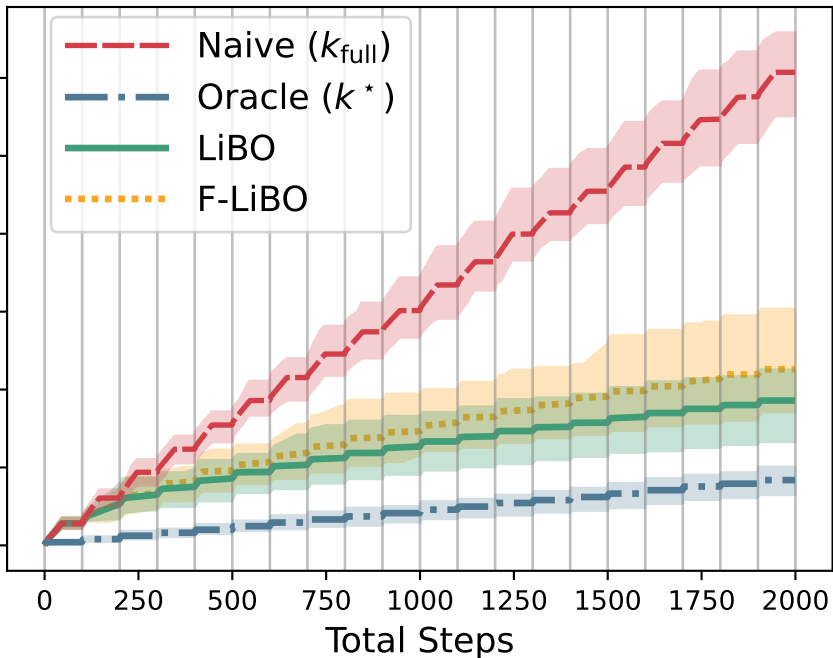

Supplement: supplementary_material [file attachment]

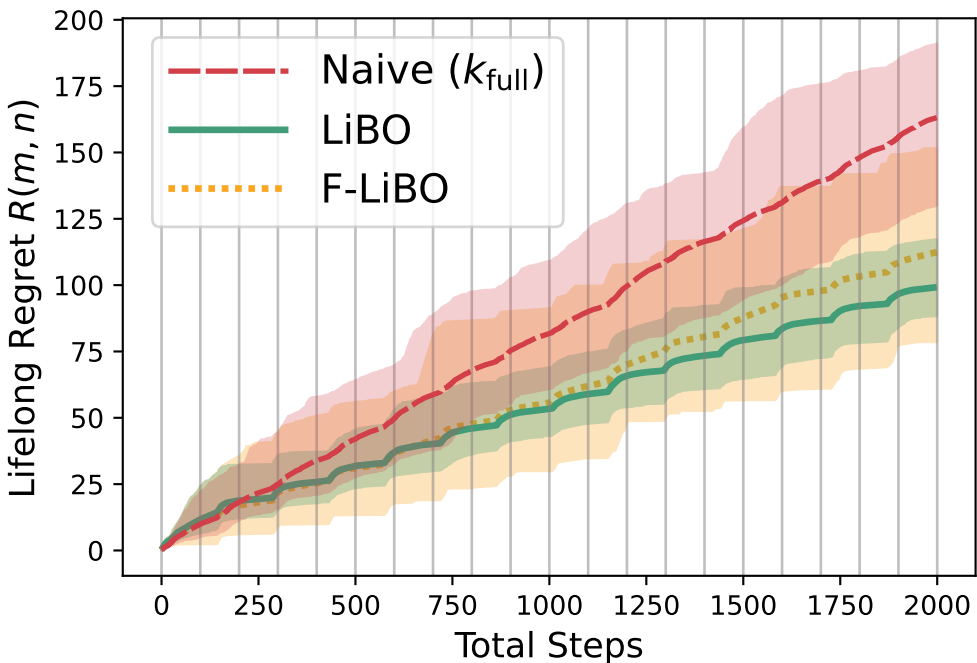

Supplement: supplementary_material [file attachment]

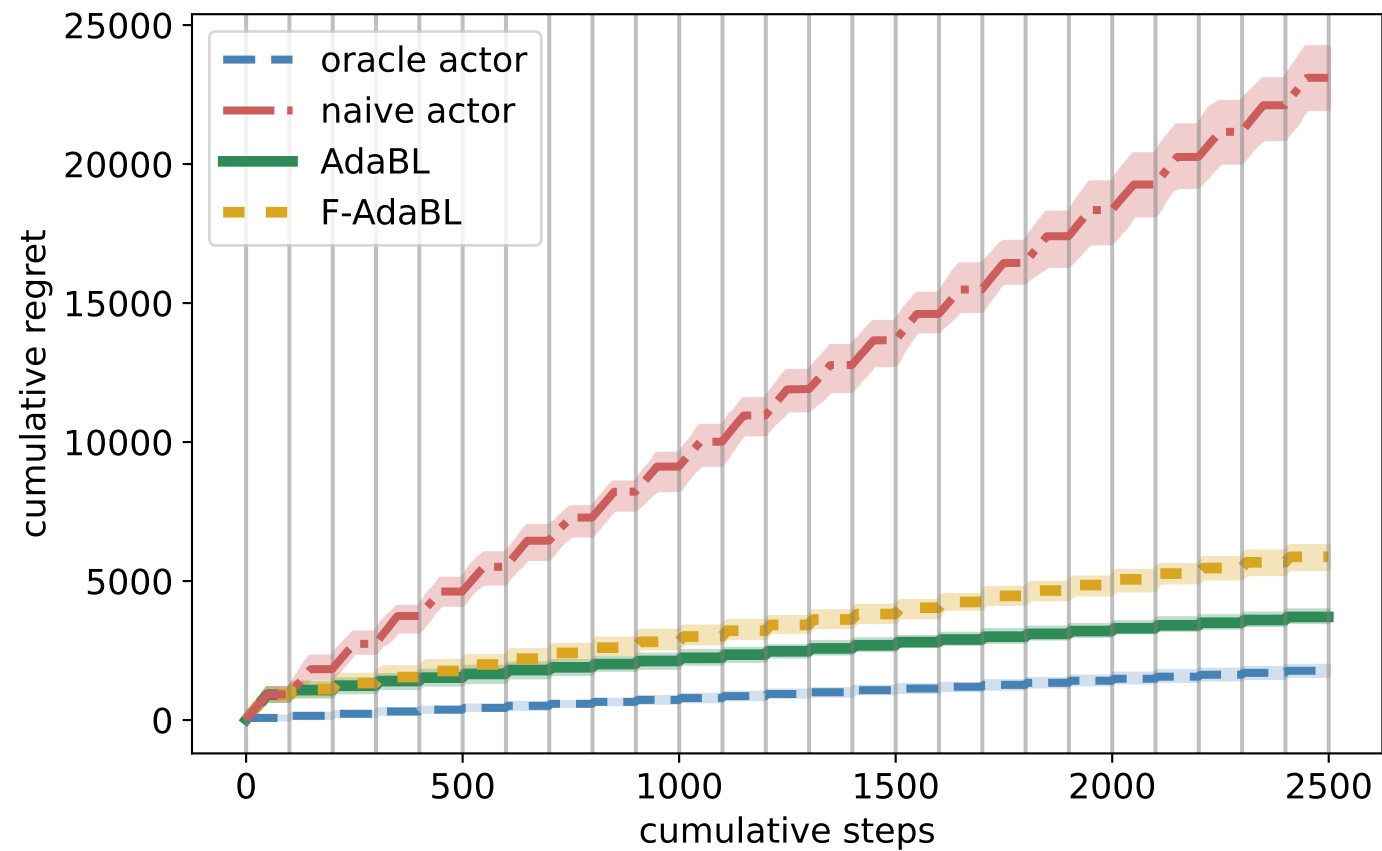

Supplement: supplementary_material [file attachment]

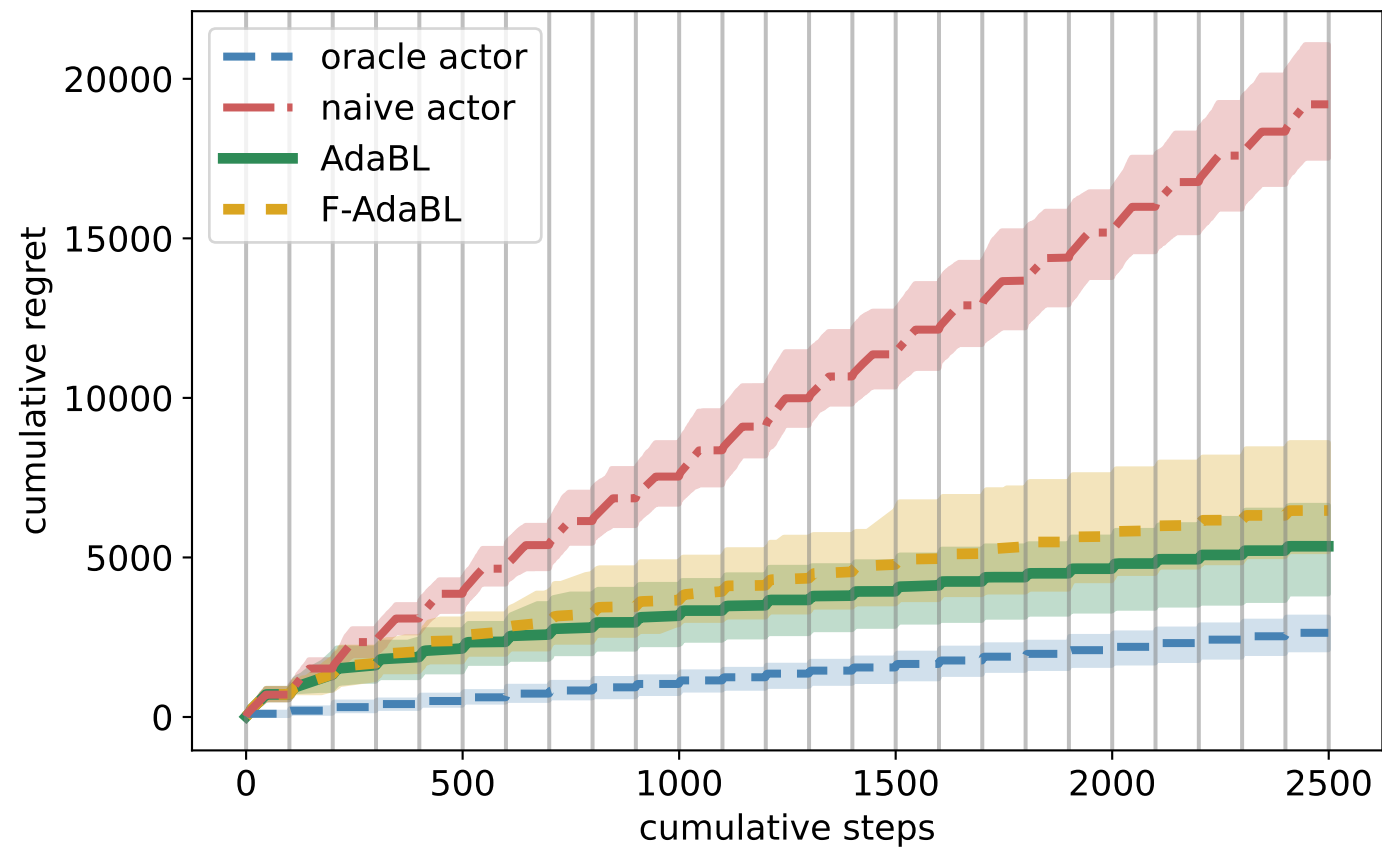

Supplement: supplementary_material [file attachment]

Lifelong Regret  $R(m, n)$ 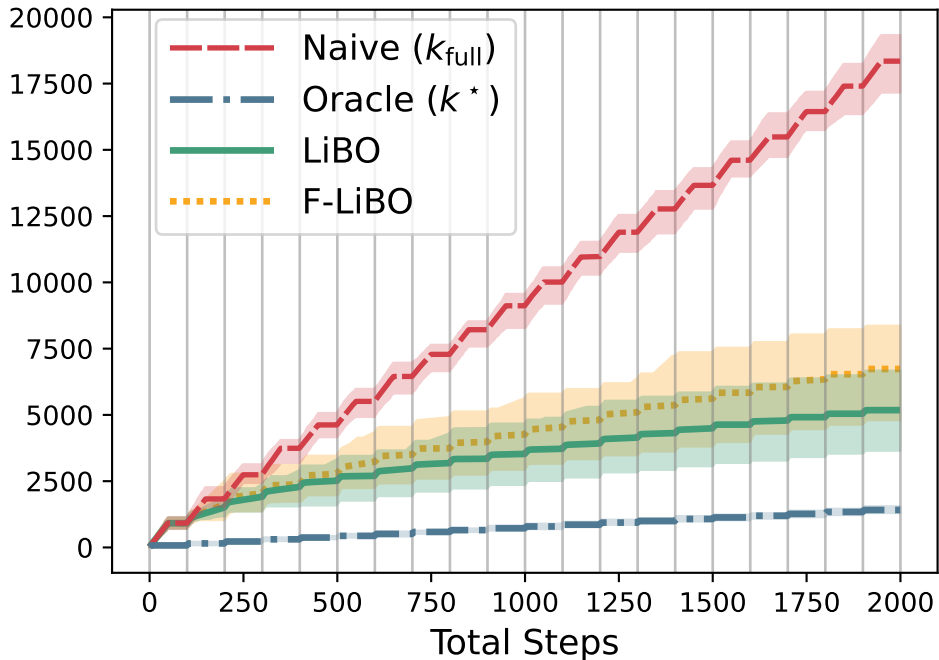

Supplement: supplementary_material [file attachment]

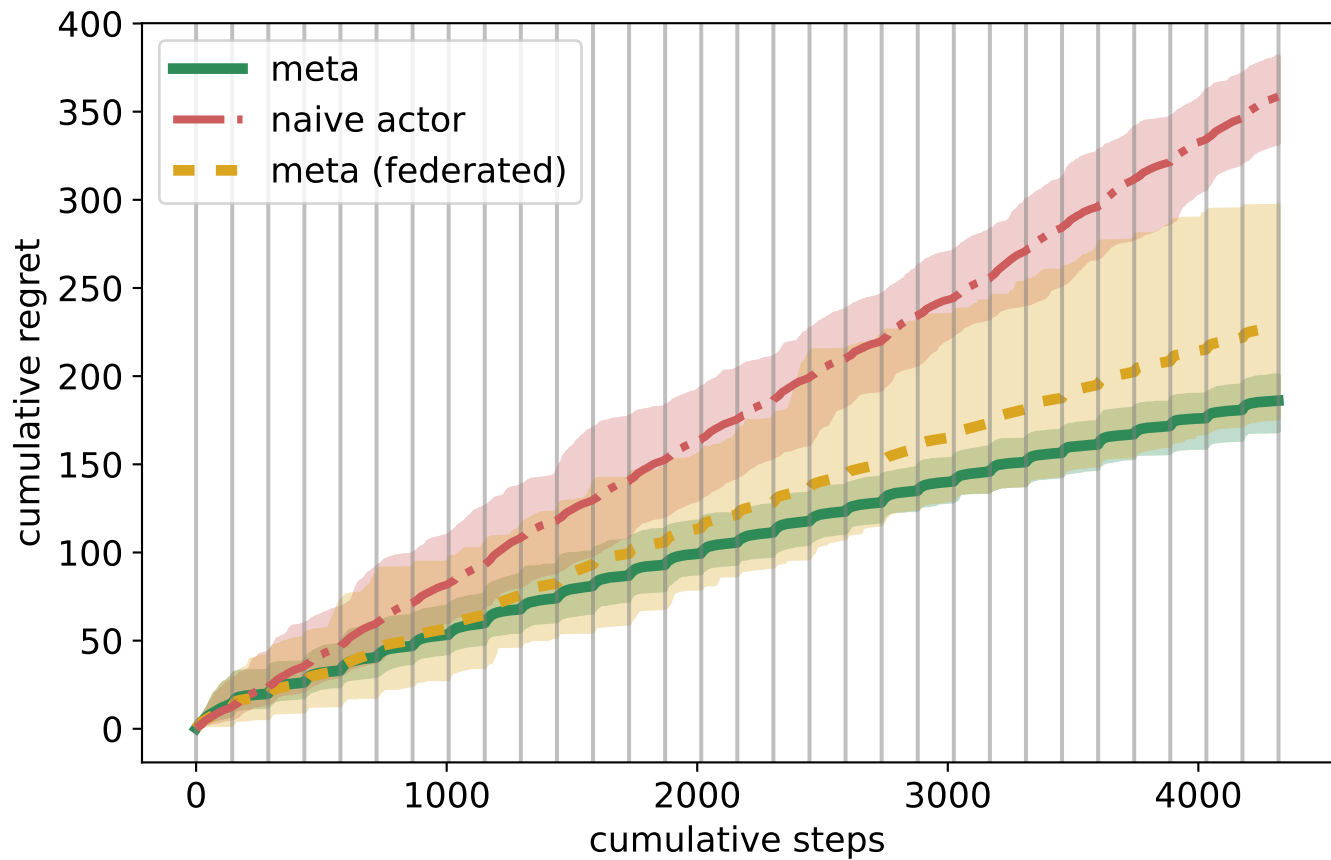

Supplement: supplementary_material [file attachment]
